# Supplementary material
Source: PubMed Central journal article supplement (PMC5811349)
Supplement: NIHMS930746-supplement.pdf [file NIHMS930746-supplement.pdf]

## **Supplemental Material**

Neurocognitive and physical functioning in the Seveso Women's Health Study

Ames Jennifer<sup>1</sup>, Warner Marcella<sup>1</sup>, Brambilla Paolo<sup>2</sup>, Mocarelli Paolo<sup>2</sup>, Satariano William A.<sup>3</sup>, Eskenazi Brenda<sup>1</sup>

<sup>1</sup>Center for Environmental Research & Children's Health (CERCH), School of Public Health, University of California, Berkeley, California, USA <sup>2</sup>Department of Laboratory Medicine, University of Milano-Bicocca, School of Medicine, Hospital of Desio, Desio-Milano, Italy

<sup>3</sup>School of Public Health, University of California, Berkeley, Berkeley, California

### **Table of Contents**

Table S1– Multivariable linear regression analyses for the relationship of categorized serum TCDD (ppt) with measures of physical functioning, Seveso Women's Health Study, Italy, 1996- 2008.

Table S2– Multivariable linear regression analyses for the relationship of serum TCDD (log10) with measures of working memory span, stratified by exposure before peak brain development (age 25), Seveso Women's Health Study, Italy, 2008–2009.

Table S3 – Multivariable linear regression analyses for the relationship of serum TCDD (log10) with measures of working memory span, stratified by menopause status in 2008, Seveso Women's Health Study, Italy, 2008–2009.

Table S4 – Targeted Maximum Likelihood Regression (tmle) regression analyses for the relationship of quartiles of serum TCDD (ppt) with measures of working memory span among women who completed the neuro-assessment in 2008, Seveso Women's Health Study, Italy, 2008–2009.

Supplementary Table 1 – Multivariable linear regression analyses for the relationship of categorized serum TCDD (ppt) with measures of physical functioning, Seveso Women’s Health Study, Italy, 1996-2008. Cutpoints based on quartiles in full SWHS cohort.

**Physical Functioning**

| TCDD exposure level (ppt, lipid-adjusted) | Time to flip 5 coins (sec)<br>(n=152) |                | Walking speed (ft/sec)<br>(n=148) |               | Reach down test time (sec)<br>(n=151) |               | Grip strength dominant hand (kg)<br>(n=98) |               | Grip strength non-dominant hand (kg)<br>(n=98) |               |
|-------------------------------------------|---------------------------------------|----------------|-----------------------------------|---------------|---------------------------------------|---------------|--------------------------------------------|---------------|------------------------------------------------|---------------|
|                                           | Adj.β <sup>a</sup>                    | 95% CI         | Adj.β <sup>a</sup>                | 95% CI        | Adj.β <sup>a</sup>                    | 95% CI        | Adj.β <sup>a</sup>                         | 95% CI        | Adj.β <sup>a</sup>                             | 95% CI        |
| 3.1 – 20.0                                | ref                                   |                | ref                               |               | ref                                   |               | ref                                        |               | ref                                            |               |
| 20.1 – 47.0                               | -1.44*                                | (-2.56, -0.32) | -0.00                             | (-0.23, 0.22) | -0.15                                 | (-0.63, 0.34) | 1.83                                       | (-1.80, 5.46) | 3.39                                           | (-1.01, 7.78) |
| 47.1 – 135.0                              | -0.56                                 | (-1.97, 0.86)  | -0.06                             | (-0.29, 0.17) | -0.27                                 | (-0.76, 0.23) | 3.58*                                      | (-0.20, 7.37) | 5.42*                                          | (0.83, 10.02) |
| >135                                      | -0.10                                 | (-1.62, 1.43)  | 0.02                              | (-0.25, 0.28) | 0.04                                  | (-0.61, 0.69) | 1.01                                       | (-3.39, 5.40) | 1.92                                           | (-2.85, 6.69) |
| Test for trend                            | p=0.39                                |                | p=0.87                            |               | p=0.96                                |               | p=0.56                                     |               | p=0.49                                         |               |

<sup>a</sup>Adjusted for age at interview, primary wage earner education in 1996, BMI in 1996

\* p<0.05

Supplementary Table 2 – Multivariable linear regression analyses for the relationship of serum TCDD (log10) with measures of working memory span, stratified by exposure before peak brain development (age 25), Seveso Women's Health Study, Italy, 2008–2009.

| Measurement         | All women (n=457)  |               | <25 years old in 1976 (n=299) |               | 25+ years old in 1976 (n=158) |               | <i>P<sub>int</sub></i> |
|---------------------|--------------------|---------------|-------------------------------|---------------|-------------------------------|---------------|------------------------|
|                     | Adj.β <sup>a</sup> | 95% CI        | Adj.β <sup>a</sup>            | 95% CI        | Adj.β <sup>a</sup>            | 95% CI        |                        |
| <b>Digit Span</b>   |                    |               |                               |               |                               |               |                        |
| Forward             | 0.18               | (-0.09, 0.45) | 0.24                          | (-0.10, 0.57) | 0.31                          | (-0.18, 0.81) | 0.78                   |
| Backward            | 0.06               | (-0.22, 0.34) | 0.14                          | (-0.21, 0.49) | -0.03                         | (-0.18, 0.82) | 0.60                   |
| <b>Spatial Span</b> |                    |               |                               |               |                               |               |                        |
| Forward             | 0.05               | (-0.21, 0.31) | 0.22                          | (-0.10, 0.53) | -0.19                         | (-0.69, 0.31) | 0.23                   |
| Backward            | -0.03              | (-0.30, 0.24) | 0.11                          | (-0.23, 0.44) | -0.17                         | (-0.68, 0.34) | 0.58                   |

<sup>a</sup>Models adjusted for age at interview, primary wage earner education in 2008

Supplementary Table 3 – Multivariable linear regression analyses for the relationship of serum TCDD (log10) with measures of working memory span, stratified by menopause status in 2008, Seveso Women’s Health Study, Italy, 2008–2009.

| Measurement         | All women (n=457)  |               | Premenopause (n=216) |               | Postmenopause (n=241) |               | <i>P<sub>int</sub></i> |
|---------------------|--------------------|---------------|----------------------|---------------|-----------------------|---------------|------------------------|
|                     | Adj.β <sup>a</sup> | 95% CI        | Adj.β <sup>a</sup>   | 95% CI        | Adj.β <sup>a</sup>    | 95% CI        |                        |
| <b>Digit Span</b>   |                    |               |                      |               |                       |               |                        |
| Forward             | 0.18               | (-0.09, 0.45) | 0.22                 | (-0.19, 0.62) | 0.28                  | (-0.13, 0.68) | 0.45                   |
| Backward            | 0.06               | (-0.22, 0.34) | 0.03                 | (-0.41, 0.46) | 0.12                  | (-0.29, 0.52) | 0.57                   |
| <b>Spatial Span</b> |                    |               |                      |               |                       |               |                        |
| Forward             | 0.05               | (-0.21, 0.31) | 0.27                 | (-0.10, 0.65) | -0.02                 | (-0.41, 0.36) | 0.56                   |
| Backward            | -0.03              | (-0.30, 0.24) | 0.07                 | (-0.38, 0.52) | 0.01                  | (-0.37, 0.39) | 0.58                   |

<sup>a</sup>Models adjusted for age at interview, primary wage earner education in 2008

Supplementary Table 4 – Targeted Maximum Likelihood Regression (tmle) regression analyses for the relationship of quartiles of serum TCDD (ppt) with measures of working memory span among women who completed the neuro-assessment in 2008, Seveso Women’s Health Study, Italy, 2008–2009.

| TCDD exposure level<br>(ppt, lipid-adjusted) | Digit span         |               |                    |               | Spatial Span       |               |                    |               |
|----------------------------------------------|--------------------|---------------|--------------------|---------------|--------------------|---------------|--------------------|---------------|
|                                              | Forward            |               | Backward           |               | Forward            |               | Backward           |               |
|                                              | Adj.β <sup>a</sup> | 95% CI        |
| 3.1 – 20.0                                   | ref                |               | ref                |               | ref                |               | ref                |               |
| 20.1 – 47.0                                  | -0.06              | (-0.85, 0.78) | -0.53              | (-1.48, 0.28) | 0.29               | (-0.45, 1.05) | -0.22              | (-1.13, 0.63) |
| 47.1 – 135.0                                 | 0.42               | (-0.33, 1.52) | -0.22              | (-0.85, 0.78) | 0.01               | (-0.64, 0.78) | 0.14               | (-0.88, 1.24) |
| >135                                         | 0.54               | (-0.21, 1.29) | -0.21              | (-0.45, 1.05) | 0.32               | (-0.38, 1.21) | -0.23              | (-1.19, 0.66) |

<sup>a</sup>Models adjusted for age at interview, primary wage earner education in 2008
